# Supplementary material
Source: PubMed Central journal article supplement (PMC4980197)
Supplement: NIHMS793572-supplement.pdf [file NIHMS793572-supplement.pdf]

**A**

| Family | Protein  | BLAST score | Mitoprot Score |
|--------|----------|-------------|----------------|
| CEBPG  | CEBPG    | 16.2        | 17             |
| CEBP   | CEBPA    | 27.7        | 12             |
|        | CEBPB    | 28.9        | 6              |
|        | CEBPD    | 27.7        | 2              |
|        | CEBPE    | 15.8        | 1              |
| DDIT3  | DDIT3    | 17.7        | 10             |
| CREB   | ATF1     | 18.9        | 11             |
|        | CREB-1   | 15.0        | 2              |
|        | CREM     | 25.4        | 4              |
| OASISA | CREB3    | 30.4        | 0              |
|        | CREB3L3  | 38.1        | 0              |
|        | CREB3L4  | 17.3        | 0.4            |
| OASISB | CREB3L1  | 22.7        | 0.7            |
| ATF6   | ATF6     | 25.0        | 0.7            |
|        | ATF6B    | 28.9        | 6              |
| CREBZF | CREBZF   | 21.9        | 35             |
| XBP1   | XBP1     | 31.2        | 0.3            |
| NFIL3  | NFIL3    | 19.2        | 0.3            |
| ATF2   | ATF2     | 27.7        | 19             |
|        | ATF7     | 31.6        | 4.5            |
|        | CREB5    | 31.2        | 6              |
| JUN    | JUN      | 33.1        | 18             |
|        | JUNB     | 16.5        | 15             |
|        | JUND     | 31.6        | 4              |
| FOS    | FOS      | 20.8        | 3              |
|        | FOSB     | 15.4        | 11             |
|        | FOSL1    | 18.5        | 9              |
|        | FOSL2    | 18.5        | 7              |
| ATF3   | ATF-3    | 21.9        | 1              |
|        | JDP2     | 20.8        | 3              |
| ATF4   | ATF-4    | 42.0        | 12             |
|        | ATF-5    | 40.0        | 30             |
| B-ATF  | B-ATF    | 25.4        | 8.6            |
|        | B-ATF2   | 21.2        | 0              |
|        | B-ATF3   | 28.1        | 18             |
| PAR    | DBP      | 18.9        | 56             |
|        | HLF      | 21.9        | 10             |
|        | TEF      | 30.0        | 1              |
| SMAF   | MAFF     | 23.9        | 6              |
|        | MAFG     | 13.1        | 3              |
| LMAF   | MAFB     | 23.1        | 5              |
|        | MAF      | 23.9        | 3              |
|        | MAFA     | NS          | 1              |
|        | NRL      | NS          | 2              |
| NFE2   | NFE2-p45 | 25.0        | 20             |
|        | NFE2L1   | 25.0        | 10             |
|        | NFE2L2   | 26.9        | 0              |
|        | NFE2L3   | 26.9        | 59             |
| BACH   | BACH1    | 27.3        | 4              |
|        | BACH     | 26.6        | 3              |

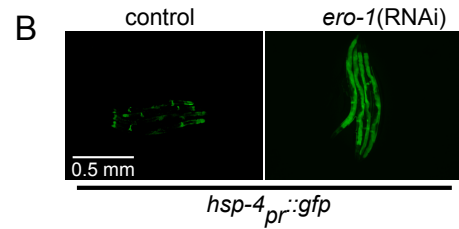

**Figure S1, related to Figure 1**

**ATF5 has the highest homology to ATFS-1 and contains a putative mitochondrial targeting sequence.**

(A) Table of bZip proteins with each protein's Mitoprot II and BLAST score. Mitoprot II score is the percentage likelihood of import into mitochondria.

(B) Photomicrographs of *hsp-4<sub>pr</sub>::gfp* treated with control or *ero-1*(RNAi). Scale bar, 0.5 mm.

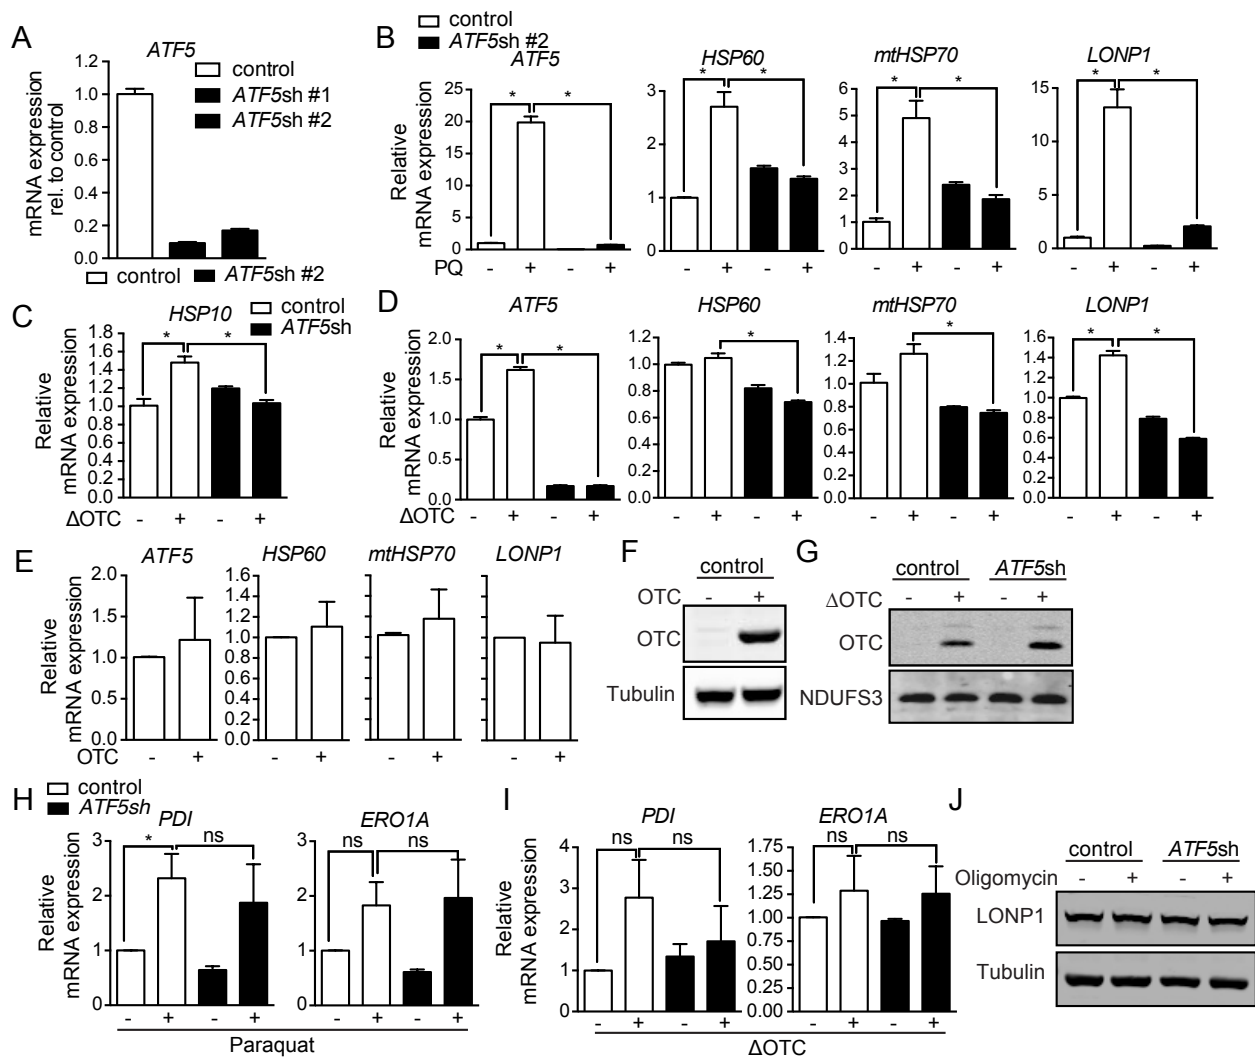

**Figure S2, related to Figure 2**

**ATF5 depletion shows ATF5 is required for UPR<sup>mt</sup> gene expression in response to stress.**

(A) Expression levels of *ATF5* mRNA in HEK 293T cells treated with vector shRNA, *ATF5* shRNA #1, or *ATF5* shRNA #2 (see Experimental Procedures) (n=3, mean  $\pm$  SEM, \*p<0.05).

(B) Expression levels of *ATF5*, *HSP60*, *mtHSP70* and *LONP1* mRNA in control or *ATF5* shRNA #2 HEK 293T cells with or without paraquat (PQ) (n=3, mean  $\pm$  SEM, p<0.05,).

(C) Expression levels of *HSP10* mRNA in control or *ATF5* shRNA #1 HEK 293T with or without  $\Delta$ OTC expression (n=3, mean  $\pm$  SEM \*p<0.05).

(D) Expression levels of *ATF5*, *HSP60*, *mtHSP70* and *LONP1* mRNA in control or *ATF5* shRNA #2 HEK 293T cells with or without  $\Delta$ OTC expression (n=3, mean  $\pm$  SEM, p<0.05,).

(E) Expression levels of *ATF5*, *HSP60*, *mtHSP70*, and *LONP1* mRNA in HEK 293T cells with or without OTC expression (n=2 combined experiments, mean  $\pm$  SEM, p<0.05).

(F-G) Immunoblots from control or *ATF5* shRNA HEK293T cell lysates with or without OTC (F), or  $\Delta$ OTC (G) expression.

(H-I) Expression levels of *PDI*, and *ERO1A* mRNA in control or *ATF5* shRNA HEK293T cells treated with either (H) PQ, or (I) expressing  $\Delta$ OTC (n=3 combined experiments, mean  $\pm$  SEM, \*p<0.05).

(J) Immunoblots from control or *ATF5* shRNA HEK293T cells with or without oligomycin treatment.

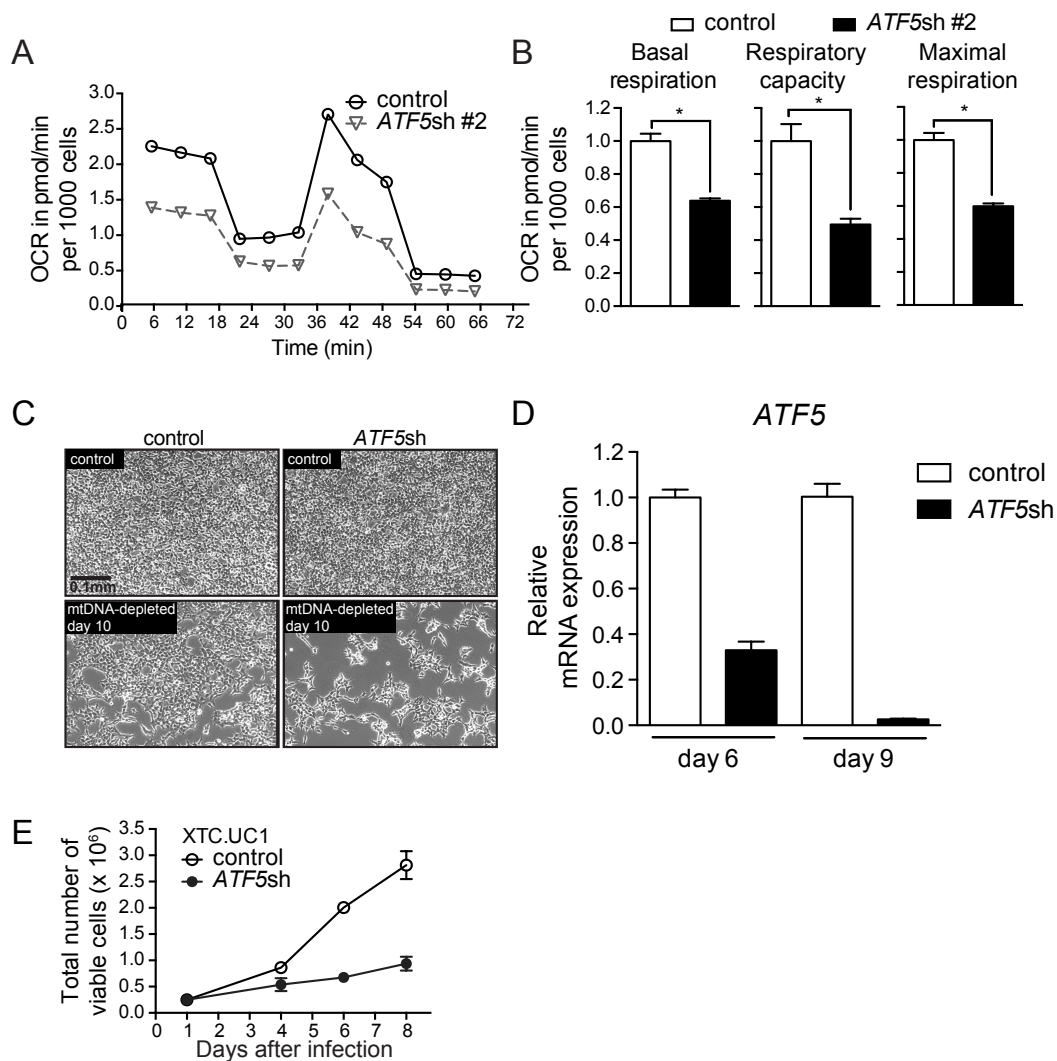

**Figure S3, related to Figure 4**

**ATF5 promotes survival and recovery from mitochondrial stress.**

(A-B) Oxygen consumption rates (OCR) of control or *ATF5* shRNA #2 HEK 293T cells (n=15 (control) and n=16 (*ATF5*sh), mean  $\pm$  SEM, \*p<0.05).

(C) Photomicrographs of control and *ATF5* shRNA HEK 293T cells following 6 days of mtDNA depletion by EtBr treatment. The cells were imaged 4 days after removal of EtBr. Scale bar, 0.1 mm.

(D) Expression levels of *ATF5* mRNA in control or *ATF5* shRNA HEK293T cells following 6 days of mtDNA depletion by EtBr treatment (n=3, mean  $\pm$  SEM).

(E) Growth curve of control or *ATF5* shRNA XTC.UC1 cells (n=2, mean  $\pm$  SEM).

## SUPPLEMENTAL EXPERIMENTAL PROCEDURES

### Worm strains and plasmids

The reporter strains *hsp-60<sub>pr</sub>::gfp(zcls9)V*, *hsp-4<sub>pr</sub>::gfp(zcls4)V*, *atfs-1(tm4525)V* and *hsp-60<sub>pr</sub>::gfp* and RNAi feeding conditions have been described previously [S1-3]. Induction of *hsp-4<sub>pr</sub>::gfp* by heat shock was performed as in [S4]. Briefly, *hsp-4<sub>pr</sub>::gfp* was incubated at 30°C for 1 hour to induce heat shock, then imaged.

To generate the *hsp-16<sub>pr</sub>::ATF5* expression plasmid, *ATF5* cDNA was amplified and ligated into the *hsp-16<sub>pr</sub>::atfs-1* plasmid replacing *atfs-1* [S1]. Generation of *hsp-16<sub>pr</sub>::ATF4* was achieved by amplifying *ATF4* cDNA and ligating into *hsp-16<sub>pr</sub>::ATF5* plasmid, replacing *ATF5*. The transgenic *C. elegans* lines were generated by co-injecting either the *hsp-16<sub>pr</sub>::ATF5* or *hsp-16<sub>pr</sub>::ATF4* plasmid (25 ng/μl) with a *myo-3<sub>pr</sub>::mCherry* (60 ng/μl) marker plasmid, and pBluescript (65 ng/μl) into *hsp-60<sub>pr</sub>::gfp; atfs-1(tm4525)* generating multiple stable extra-chromosomal arrays. The *hsp-16<sub>pr</sub>::ATF5* transgene was crossed into the described reporter worms. The *myo-3<sub>pr</sub>::ΔOTC* plasmid was generated by amplifying ΔOTC [S5] and ligating it into the *myo-3<sub>pr</sub>::mCherry::ubl-5* plasmid by replacing the *ubl-5* open reading frame. The ATF5::GFP mammalian expression plasmid was generated by amplifying *ATF5* cDNA and ligating into the EGFP-N1 plasmid (Clontech). All plasmids were confirmed by sequencing.

### Cell culture and plasmids

HeLa and HEK 293T cells were cultured in DMEM supplemented with 10 % FBS, 10 mM HEPES, 2 mM L-glutamine, 100 U/ml penicillin/100 μg/ml streptomycin. *ATF5*-knockdown cells were generated through lentiviral-driven gene silencing using two different shRNAs (*ATF5sh* #1(Thermo Scientific): 5'-AAGTCTTCCATCTGTTCCAGC-3'; *ATF5sh* #2(Sigma): 5'-TGTCTTGGATACTCTGGACTT-3') expressed by the pLKO.1 vector, while pLKO.1 was used as a control (Sigma). To induce mitochondrial stress, cells were either transfected with ΔOTC plasmid [S5], or treated with 400 μM paraquat for 48 hours unless stated otherwise. Treatment of HEK 293T cells with antimycin (Sigma), piericidin (Santa Cruz), and/or oligomycin (Sigma) was for 24 hours before collecting cells for qPCR as described below. Cellular doubling times were calculated as described [S6].

### RNA Isolation, qRT-PCR and Western Blots

Total RNA was isolated using RNA Stat-60 (amsbio) or RNEasy Plus Mini-Kit (Qiagen). cDNA synthesis and qPCR was performed as described [S7] using the following primers: *ATF5* forward 5'-CTGGCTCCCTATGAGGTCCTTG-3' and reverse 5'-GAGCTGTGAAATCAACTCGCTCAG-3'; *HSP60* forward 5'-GATGCTGTGGCCGTTACAATG-3' and reverse 5'-GTCAATTGACTTTGCAACAGTCACAC-3'; *mtHSP70* forward 5'-CAAGCGACAGGCTGTCACCAAC-3' and reverse 5'-CAACCCAGGCATCACCATTGG-3'; *LONP1* forward 5'-CATTGCCTTGAACCCTCTC-3' and reverse 5'-ATGTCGCTCAGGTAGATGG-3'; *HD-5* forward 5'-ACCTTGCTATCTCCTTTCAGG-3' and reverse 5'-CGGTTCCGCAATAGCAGGTG-3'; *HSP10* forward 5'-TGGCAGGACAAGCGTTTAG-3' and reverse 5'-GGTTACAGTTTCAGCAGCAC-3'; *PDI* forward 5'-TGAGAACATCGTCATCGCC-3' and reverse 5'-CGTTCCTCCGTTGTAATCAATG-3'; *ERO1A* forward 5'-CAAGGGACAAGTGAAGAGAAC-3' and reverse 5'-CCCCATTTCTTTTCTAACCAG-3'. And, *HPRT* forward 5'-CTTTGCTGACCTGCTGGATT-3' and reverse 5'-TCCCCTGTTGACTGGTCATT-3' was used as a reference gene.

SDS-Page, western blots and mouse liver sucrose fractionation were performed as described [S1, 8] using the following antibodies: OTC (Santa Cruz), Tubulin (Santa Cruz) NDUFS3 (Abcam), GFP (Roche), ATF5 [S9], and KDEL (Stressgen) and imaged on an Odyssey infrared imager (LI-COR).

### Microscopy

HeLa cells were transfected using Lipofectamine 2000 (Life Technologies) with 1 μg of GFP, Histone 2B::GFP, or ATF5::GFP expressing plasmids. The cells were treated with 10 μM MG-132 for 6 hours, stained with MitoTracker Red FM (Life) for 30 minutes prior to fixation with 4% paraformaldehyde (Fisher Chemicals) and incubated with primary GFP antibody (Roche) followed by incubation with secondary antibody AlexaFluor488 (Life). Samples were imaged on a Nikon Eclipse Ti.

*C. elegans* images were acquired as previously described [S1].

### Respiration Analysis

Oxygen consumption was measured using a Seahorse Extracellular Flux Analyzer XF<sup>96</sup> as described [S10]. Analysis plates were coated with Corning Cell-Tak. 64,000 cells were seeded per well in 30 μl of XF-Media by centrifugation. After a 25 minute incubation at 37°C in an incubator w/o CO<sub>2</sub>, 145 μl of XF-Media was added to each well followed by another incubation period of 20 minutes, and then the plates were subjected to analysis using 1 μM oligomycin, 500 nM FCCP and 1 μM rotenone/antimycin as indicated. Data were normalized to cell number.

**mtDNA Content**

DNA was extracted from  $2 \times 10^6$  cells using phenol/chlorophorm/isoamyl alcohol (25:24:1) [S11] and mtDNA quantitation by qPCR was performed as described [S12] using the following primers: mtDNA 16S rRNA forward 5'-GCCTTCCCCCGTAAATGATA-3' and reverse 5'-TTATGCGATTACCGGGCTCT-3'; nDNA  $\beta$ 2-M forward 5'-TGCTGTCTCCATGTTTGATGTATCT-3' and reverse 5'-TCTCTGCTCCCCACCTCTAAGT-3'.

**Bioinformatics**

Promoter search was performed using the Signal Search Analysis Server program FindM using the UPR<sup>mt</sup> Element previously described [S2]. BLAST analysis against the whole sequence of ATFS-1 was done using the BLASTP 2.3.1+ program [S13].

**Statistics**

Unless stated otherwise, experiments were performed at least three times, or in triplicates and expressed as mean  $\pm$  SEM. Bar graphs of qPCR and Seahorse data show one representative experiment. Group differences were assayed using two-tailed Student's t test. Significance was considered when  $p \leq 0.05$ . Pearson correlation coefficient was performed as described in [S14].

## Supplemental References

- S1. Nargund, A.M., Pellegrino, M.W., Fiorese, C.J., Baker, B.M., and Haynes, C.M. (2012). Mitochondrial import efficiency of ATFS-1 regulates mitochondrial UPR activation. *Science* 337, 587-590.
- S2. Nargund, A.M., Fiorese, C.J., Pellegrino, M.W., Deng, P., and Haynes, C.M. (2015). Mitochondrial and nuclear accumulation of the transcription factor ATFS-1 promotes OXPHOS recovery during the UPR(mt). *Mol Cell* 58, 123-133.
- S3. Calfon, M., Zeng, H., Urano, F., Till, J.H., Hubbard, S.R., Harding, H.P., Clark, S.G., and Ron, D. (2002). IRE1 couples endoplasmic reticulum load to secretory capacity by processing the XBP-1 mRNA. *Nature* 415, 92-96.
- S4. Yoneda, T., Benedetti, C., Urano, F., Clark, S.G., Harding, H.P., and Ron, D. (2004). Compartment-specific perturbation of protein handling activates genes encoding mitochondrial chaperones. *J Cell Sci* 117, 4055-4066.
- S5. Zhao, Q., Wang, J., Levichkin, I.V., Stasinopoulos, S., Ryan, M.T., and Hoogenraad, N.J. (2002). A mitochondrial specific stress response in mammalian cells. *The EMBO journal* 21, 4411-4419.
- S6. Chanvorachote, P., Luanpitpong, S., Chunhacha, P., Promden, W., and Sriuranpong, V. (2012). Expression of CA125 and cisplatin susceptibility of pleural effusion-derived human lung cancer cells from a Thai patient. *Oncology letters* 4, 252-256.
- S7. Pellegrino, M.W., Nargund, A.M., Kirienko, N.V., Gillis, R., Fiorese, C.J., and Haynes, C.M. (2014). Mitochondrial UPR-regulated innate immunity provides resistance to pathogen infection. *Nature* 516, 414-417.
- S8. Graham, J.M. (2001). Purification of a crude mitochondrial fraction by density-gradient centrifugation. *Current protocols in cell biology / editorial board, Juan S. Bonifacino ... [et al.] Chapter 3, Unit 3 4.*
- S9. Zhou, D., Palam, L.R., Jiang, L., Narasimhan, J., Staschke, K.A., and Wek, R.C. (2008). Phosphorylation of eIF2 directs ATF5 translational control in response to diverse stress conditions. *The Journal of biological chemistry* 283, 7064-7073.
- S10. Yoshida, S., Tsutsumi, S., Muhlebach, G., Sourbier, C., Lee, M.J., Lee, S., Vartholomaiou, E., Tatokoro, M., Beebe, K., Miyajima, N., et al. (2013). Molecular chaperone TRAP1 regulates a metabolic switch between mitochondrial respiration and aerobic glycolysis. *Proceedings of the National Academy of Sciences of the United States of America* 110, E1604-1612.
- S11. Guo, W., Jiang, L., Bhasin, S., Khan, S.M., and Swerdlow, R.H. (2009). DNA extraction procedures meaningfully influence qPCR-based mtDNA copy number determination. *Mitochondrion* 9, 261-265.
- S12. Venegas, V., and Halberg, M.C. (2012). Measurement of mitochondrial DNA copy number. *Methods in molecular biology* 837, 327-335.
- S13. Altschul, S.F., Wootton, J.C., Gertz, E.M., Agarwala, R., Morgulis, A., Schaffer, A.A., and Yu, Y.K. (2005). Protein database searches using compositionally adjusted substitution matrices. *The FEBS journal* 272, 5101-5109.
- S14. Dunn, K.W., Kamocka, M.M., and McDonald, J.H. (2011). A practical guide to evaluating colocalization in biological microscopy. *American journal of physiology. Cell physiology* 300, C723-742.
